# Supplementary material for: Evaluation of Kinetic Pseudo-Order in the Photocatalytic Degradation of Ofloxacin
Source: Preprints.org preprint supplement (doi:10.20944/preprints202111.0573.v1), 2021-11-30
Supplement: Supplementary file 1 [file supplementary]

## Sheet: Rytwo and Zelkind pseudo orders
						C0	1
pollutant	Ofloxacin	20 uM
				data points	20
Catalyst	TiO2 H2O2	2
				t (min	C/C0	calculated	diff
				1.02367	0.961966	0.949854	0.000146708
				3.58333	0.860514	0.833222	0.000744896
				5.63333	0.781476	0.74833	0.00109863
K	0.05			7.68167	0.712879	0.670563	0.00179061
order	0.8			9.72667	0.655319	0.599511	0.00311447
				14.85	0.527804	0.447634	0.00642715
SUMSQ/n	0.0105707			17.9167	0.468376	0.372628	0.00916776
	10570.7			22.0167	0.396298	0.288409	0.0116401
RSQ	0.996872			26.1167	0.344257	0.220157	0.0154008
				30.2167	0.296205	0.165485	0.0170878		This file was prepared by Giora Rytwo (giorarytwo@gmail.com) as "Supplementary Material" for our submission to CATALYSTS
t1/2	12.9449	min		34.3	0.259784	0.122413	0.0188709		Instructions
				36.8667	0.235928	0.100298	0.0183955		1. Check at the data tab that "Solver" is installed. If not, use Excel's help to install it
				40.9667	0.204347	0.0716946	0.0175966		2. B14 is RMSE. Cell B15 is the "RMSE" increased for better sensitivity, B12 is the pseudo-order and B11 is kinetic coefficient
				45.0667	0.178368	0.0500242	0.0164722		3. Open Solver dialog. "Set objective" should be B15 or "sum_errors"
				48.65	0.159351	0.0357028	0.015289		4. "To" should be "min"
				52.7333	0.140504	0.0235925	0.0136684		5."by Changing variable cells" should be B11:B12. If you want to use a fixed order, change to B11 and write in B12 the order you are interested
				55.8167	0.126751	0.0168381	0.0120809		6. Method- better leave GRG
				59.9167	0.116648	0.0103471	0.0112999		Press "solve" and this should work….cell B18 gives you half life time
				61.95	0.112743	0.00797578	0.0109762		Beware- the program can't work with n=1 so if you want to check that- put in B12 for example 1.00001 or 0.9999
				65.0333	0.105951	0.00522722	0.0101453
